# Supplementary material
Source: PubMed Central journal article supplement (PMC3499030)
Supplement: NIHMS415625-supplement-supplement_1.pdf [file NIHMS415625-supplement-supplement_1.pdf]

**Figure S11.** Overview over original research (OR) and review articles (RA) which address the issues of pediatric imaging and / or provide techniques to work with children within the imaging environment; in chronological order.

| Authors                  | Type [OR/RA] | Approach                                                                                                                                                                                                                                                                                                                                                                                                               | Subjects                                                            | Sex [M/F] | Age [years]          | Results                                                                                                                       |
|--------------------------|--------------|------------------------------------------------------------------------------------------------------------------------------------------------------------------------------------------------------------------------------------------------------------------------------------------------------------------------------------------------------------------------------------------------------------------------|---------------------------------------------------------------------|-----------|----------------------|-------------------------------------------------------------------------------------------------------------------------------|
| Slifer et al., 1993      | OR           | Operant behavioral technique                                                                                                                                                                                                                                                                                                                                                                                           | 4 children                                                          | [2/2]     | 5 to 6               | Significant decrease in movement                                                                                              |
| Slifer et al., 1994      | OR           | Behavioral training with motion control (radiation treatment in children without sedation)                                                                                                                                                                                                                                                                                                                             | 10 children                                                         |           | 3 to 7               | 8 of 10 children benefit (no sedation)                                                                                        |
| Tyc et al., 1995         | OR           | Cognitive-behavioral intervention in oncology patients                                                                                                                                                                                                                                                                                                                                                                 | 55 children                                                         |           | 6 to 18              | Reduction in distress                                                                                                         |
| Slifer, 1996             | OR           | Behavioral training with motion control (radiation treatment in children without sedation)                                                                                                                                                                                                                                                                                                                             | 11                                                                  |           |                      | For 9 of 11 children sedation could be avoided                                                                                |
| Rosenberg et al., 1997   | OR           | Simulation using a mock MRI unit                                                                                                                                                                                                                                                                                                                                                                                       | 32 children<br>16 obsessive compulsive disorders (OCD), 16 controls | [16/16]   | 6 to 17 (mean: 12.2) | Significant decrease in heart rate and self-reported distress level in all subjects<br>All subjects completed the MRI session |
| Pressdee et al., 1997    | OR           | Play Therapy                                                                                                                                                                                                                                                                                                                                                                                                           | 169 children                                                        |           | 4 to 8               | One of the 169 children later needed GA                                                                                       |
| Armstrong & Aitken, 2000 | OR /RA       | This paper reviews the role of play preparation in pediatric anesthesia                                                                                                                                                                                                                                                                                                                                                |                                                                     |           |                      |                                                                                                                               |
| Bookheimer, 2000         | RA           | A variety of technological, experimental, and practical aspects are reviewed when imaging children (fMRI basics, comparing groups and choosing dependent variables, regional activation patterns as dependent variables, anatomical constraints, statistical considerations, practical considerations, anesthesia and pediatric imaging). Suggestions for their management are provided.                               |                                                                     |           |                      |                                                                                                                               |
| Slifer et al., 2002      | OR           | Operant behavioral technique                                                                                                                                                                                                                                                                                                                                                                                           | 4 children (2 ADHD)                                                 | [2/2]     | 7 to 10              | Accuracy increased whereas head motion decreased                                                                              |
| Byars et al., 2002       | OR           | Systematic desensitization, orientation training                                                                                                                                                                                                                                                                                                                                                                       | 209 children                                                        | [106/103] | 5 to 18 (mean: 10)   | Overall success rate: 80%<br>86% of all girls<br>74% of all boys                                                              |
| Poldrack et al., 2002    | RA           | Review of methodological issues and solution which arise when performing pediatric fMRI, including compliance (minimizing anxiety, minimizing motion), data processing (motion correction, modeling motion, spatial normalization), statistical analysis and the hemodynamic response, as well as progress in pediatric fMRI (Imaging basic cognitive processes, clinical fMRI, imaging neuropsychological disorders). |                                                                     |           |                      |                                                                                                                               |

|                               |    |                                                                                                                                                                                                                                                                                                                                                                                                                                    |                                                            |           |                         |                                                                                                                                              |
|-------------------------------|----|------------------------------------------------------------------------------------------------------------------------------------------------------------------------------------------------------------------------------------------------------------------------------------------------------------------------------------------------------------------------------------------------------------------------------------|------------------------------------------------------------|-----------|-------------------------|----------------------------------------------------------------------------------------------------------------------------------------------|
| Wilke et al., 2003            | RA | An overview over current and future applications of fMRI is given, and typical problems, pitfall, and benefits of doing fMRI in pediatric age group are discussed. This is done on the background of fMRI basics, current research applications brain plasticity and current clinical applications.                                                                                                                                |                                                            |           |                         |                                                                                                                                              |
| Davidson et al., 2003         | RA | Important issues relevant to developmental and clinical neuroimaging research are discussed, including anatomical, physical and psychological differences between children and adults, as well as general issues. Additionally, the development of age appropriate and scanner appropriate tasks for children are discussed, also in the context of an empirical study of development and learning in healthy children and adults. |                                                            |           |                         |                                                                                                                                              |
| Overy et al., 2005            | RA | Behavioral preparation techniques                                                                                                                                                                                                                                                                                                                                                                                                  | 33 children                                                |           | 5 to 7                  | Mean performance similar during practice and MRI session (no adverse effect due to MRI environment after training)                           |
| Sury et al., 2005             | RA | Review - problems of painless imaging (Ultrasound & echocardiography, computer tomography, nuclear medicine imaging, positron emission tomography, magnetic resonance imaging) and patient management techniques (behavioral techniques, natural sleep, sedation, anaesthesia)                                                                                                                                                     |                                                            |           |                         |                                                                                                                                              |
| DeAmorim e Silva et al., 2006 | OR | Practice magnetic resonance unit                                                                                                                                                                                                                                                                                                                                                                                                   | 134 children (retrospective evaluation)                    | [63/71]   | 4.1 to 16.1 (mean 7.7)  | Overall success rate: 90% of all children passed the practice session<br>98% of those had a clinical non-GA MRI<br>94% of those with success |
| Kotsoni et al., 2006          | RA | Review of methodological and theoretical issues (developmental differences in anatomy & physiology and developmental and clinical differences in ability) and provides possible approaches (acclimation to, and modification of, the imaging environment for pediatric population)                                                                                                                                                 |                                                            |           |                         |                                                                                                                                              |
| Epstein et al., 2007          | OR | Mock scanner training<br>Operant feedback using a video system                                                                                                                                                                                                                                                                                                                                                                     | 45 participants (23 youth, 22 parents / ADHD and non-ADHD) | [24/21]   | adults: 47<br>youth: 17 | 10% data loss (excessive movement > 2mm)<br>No in between group differences                                                                  |
| Hallowell et al., 2008        | OR | (1) behavioral technique (2) use of a practice MRI unit                                                                                                                                                                                                                                                                                                                                                                            | 291 children                                               | [142/149] | 3.6 to 17 (mean 7.9)    | 74.9% pass at practice<br>12 % borderline pass<br>96% diagnostic useful images of children entering MRI machine                              |
| O'Shaughnessy et al., 2008    | RA | Review considering principles of fMRI, issues relevant to imaging children (anatomy, development, response variability, task selection, cooperation and movement), research using fMRI to examine cognitive processing in pediatric population (executive functions, visual spatial processing, facial expression and special focus on language studies) and applications to patient care                                          |                                                            |           |                         | Reliable data in 95% of typically developing children > 8 years<br>80% of children aged 4 to 5                                               |
| Hunt & Thomas, 2008           | RA | Review aiming to provide a foundation for investigators aiming to use (f)MRI in research. Special consideration is given towards basic concepts of MRI physics, typical MRI components, scan types, experimental design factors, work with pediatric and special population.                                                                                                                                                       |                                                            |           |                         |                                                                                                                                              |

|                          |    |                                                                                                                                                                                                                                                              |             |                             |                                                                                                                                                                                                               |
|--------------------------|----|--------------------------------------------------------------------------------------------------------------------------------------------------------------------------------------------------------------------------------------------------------------|-------------|-----------------------------|---------------------------------------------------------------------------------------------------------------------------------------------------------------------------------------------------------------|
| Raschle et al., 2009     | P  | Video Protocol for Pediatric Neuroimaging (incorporates the use of a mock scanner as well as behavioral management techniques)                                                                                                                               |             | 4.9 to 6.3 years (mean 5.5) | Overall success rate: 95%. Overall movement decreased whereas chance of obtaining high quality images increased.                                                                                              |
| Thomason, 2009           | RA | Review of pediatric neuroimaging procedures, addresses issues, such as child movement and anxiety and reviews reports of pediatric neuroimaging participants.                                                                                                |             |                             |                                                                                                                                                                                                               |
| Church et al., 2010      | RA | Discussion and overview of various issues related to pediatric neuroimaging, including assessing task performance, dealing with group performance differences, controlling for movement, statistical power, atlas registration and data analysis strategies. |             |                             |                                                                                                                                                                                                               |
| De Bie, HMA et al., 2010 | RA | Confirms success rate of mock scanner use in pediatric neuroimaging studies                                                                                                                                                                                  | 90 children | 3 to 14 years               | For children under 7 years of age, 33 out of 36 were able to continue to the fMRI session after training, and out of the 33, 23 of them had less than 3mm movement during image acquisition.                  |
| Schlund et al., 2011     | P  | Describes the development and application of an individualized multiple reward approach for increasing the number of fMRI tasks children complete during pediatric neuroimaging sessions.                                                                    | 28 children | 9 to 13                     | Higher compliance and task completion rate in children assessed using an individualized multiple reward approach (Compliance in standard reward group: 68.4%; compliance in the multiple reward group: 93.6%) |

---

Notes: Original Research (OR), review articles (RA), male (M), female (F)

Type of file: figure

Label: Figure S2

Filename: NYAS\_6457\_sm\_FigureS2.doc

**Figure S12.** Overview over original research (OR) and review articles (RA) which address the issues of pediatric imaging and / or provide techniques to work with infants within the imaging environment; in chronological order.

| Authors                       | Type [OR\RA]        | Approach                                                                                                                                                                                                                                                                                                                          | Subjects | Sex [M/F] | Age [months]   | Result                                                                                                                                                                    |
|-------------------------------|---------------------|-----------------------------------------------------------------------------------------------------------------------------------------------------------------------------------------------------------------------------------------------------------------------------------------------------------------------------------|----------|-----------|----------------|---------------------------------------------------------------------------------------------------------------------------------------------------------------------------|
| Anderson et al., 2001         | OR                  | Natural Sleep Technique (Infants were swaddled, outfitted with earphones, infants' heads were lightly packed using foam padding and towels)                                                                                                                                                                                       | 20       | [11/9]    | 1 week         | Images acquired successfully in 14 of 20 infants, 6 woke up during scan sessions with no adverse events experienced.                                                      |
| Dehaene-Lambertz et al., 2002 | OR                  | Infants were awake or naturally sleeping with the following materials: special noise protection foam, noise protection helmet, infant's body/head swaddled with bandages to ensure comfort/discourage movements                                                                                                                   | 20       | [6/14]    | 2-3 months     |                                                                                                                                                                           |
| Gilmore et al., 2004          | OR                  | Feed & Wrap Technique (Neonates were fed, swaddled, fitted with ear protection and heads secured in a vacuum-fixation device in a 3T head-only scanner. A parent stayed in the MR room throughout image acquisition)                                                                                                              | 20       | [10/10]   | newborns       | Obtained quality images without significant motion in 13 of 20 neonates. Most of these failures were due to failure getting the infant to sleep before image acquisition. |
| Paterson et al., 2004         | Conference Abstract | Protocol outlining the approach to the Natural Sleep Technique in infants from 3 to 12 months of age, outlining the preparation involved, procedure for putting the infant to sleep, and the comfort and sound attenuation equipment necessary for MRI with naturally sleeping infants.                                           |          |           |                | Scanning success at 3-4 months: 60% (6 out of 10), 6-7 months: 72% (39 of 54), 12-13 months: 62.5% (20 of 32), with a subset needing multiple session attempts            |
| Sury et al., 2005             | RA                  | Review summarizes approaches to implementing behavioral techniques when working with infants, protocol for using sedation/anesthesia, and the Natural Sleep Technique, along with a discussion on the pros and cons of selecting each approach. The research team reports a 50-75% success rate with the Natural Sleep Technique. |          |           |                |                                                                                                                                                                           |
| Almli et al., 2007            | OR                  | Feed & Wrap Technique (Newborn Infants are fed and swaddled to sleep during daytime or nighttime. Parental education about the scan and testing process in the mock scanner environment)                                                                                                                                          | 106      |           | newborns-4 yrs | Of 106 infants and children, 75 were successful (see page 321, outlines reasons for failure)                                                                              |

|                             |    |                                                                                                                                                                                                                               |    |                   |                    |                                                                                                                                                          |
|-----------------------------|----|-------------------------------------------------------------------------------------------------------------------------------------------------------------------------------------------------------------------------------|----|-------------------|--------------------|----------------------------------------------------------------------------------------------------------------------------------------------------------|
| Gilmore et al., 2007        | OR | Feed & Wrap Technique (Neonates were fed, swaddled, fitted with ear protection and heads secured in a vacuum-fixation device in a 3T head-only scanner. A parent stayed in the MR room throughout image acquisition)          | 74 | [40/34]           | Newborns           |                                                                                                                                                          |
| Redcay et al., 2007         |    | Natural Sleep Technique (child fell asleep naturally in waiting room or scanner room. After 5–10 min of sleep on the scanner bed, earplugs and headphones were placed on the child)                                           | 21 | [14/7]            | 30-60 months       |                                                                                                                                                          |
| Knickmeyer et al., 2008     | OR | Feed & Wrap Technique (neonates fell asleep after being fed and & swaddled easily, having skipped their nap for the day. Neonates fitted with ear protection and secured in vacuum-fixation device in a 3T head-only scanner) | 98 | [49/49]           | newborn-2 yrs      |                                                                                                                                                          |
| Hansen, 2009                | OR | Feed & Wrap Technique (infants fasted for 4 hours, fed just prior to the scan to induce sleep and positioned in an immobilisation device, VacFix Vacuum Cushion)                                                              | 36 |                   | newborns           | 89% success rate                                                                                                                                         |
| Ortiz-Mantilla et al., 2010 | OR | Natural Sleep Technique (followed the protocol of Paterson et al, 2004)                                                                                                                                                       | 27 | [15/12] ([13/11]) | 6 and 12 months    | Success rate at 6 months 72%; Success rate at 12 months 63% ( 45% of all participants were longitudinal scans, thus acquisition at both 6 and 12 months) |
| Glasel et al., 2011         | OR | Natural Sleep Technique (Asleep during MR imaging; minimized noise exposure by covering magnet bore with noise protection foam)                                                                                               | 14 | [9/5]             | 1 month - 4 months |                                                                                                                                                          |
| Windram et al., 2011        | OR | Feed & Wrap Technique (infants fasted for 4 hours prior to the scan and fed immediately before the MRI, swaddled with infant sheets and were placed in a immobilizer, MedVac Bag)                                             | 20 |                   | newborn-6 months   | Success in all 20 with sufficient image quality                                                                                                          |

---

Notes: Original Research (OR), review articles (RA), male (M), female (F)

Type of file: figure

Label: Figure S3

Filename: NYAS\_6457\_sm\_FigureS3.doc



|              | # of children recruited | # of imaging sessions | Total # of attempted MRIs | # of successful attempts | # of unsuccessful attempts | Overall Success Rate (%) |
|--------------|-------------------------|-----------------------|---------------------------|--------------------------|----------------------------|--------------------------|
| 3-4 months   | 10                      | 9x1<br>1x2            | 11                        | 6                        | 5                          | 55%                      |
| 6-7 months   | 59                      | 51x1<br>8x2           | 67                        | 43                       | 28                         | 64%                      |
| 8-11 months  | 8                       | 6x1<br>2x2            | 10                        | 5                        | 5                          | 50%                      |
| 12-15 months | 32                      | 28x1<br>9x2           | 36                        | 22                       | 18                         | 61%                      |
| 4-6 years    | 45                      | 45x1                  | 45                        | 44                       | 1                          | 97%                      |
